# Supplementary material
Source: bioRxiv or medRxiv preprint supplement (https://www.biorxiv.org/highwire/filestream/90005/field_highwire_adjunct_files/0/290858-1.pdf)
Supplement: Supplementary file [file 290858-1.pdf]

Supplement to “Combining high resolution and exact calibration to  
boost statistical power: A well-calibrated score function for  
high-resolution MS2 data”

Andy Lin  
Department of Genome Sciences  
University of Washington

J. Jeffrey Howbert  
Department of Genome Sciences  
University of Washington

William Stafford Noble\*  
Department of Genome Sciences  
Department of Computer Science and Engineering  
University of Washington

March 8, 2018

---

\*Corresponding author: Box 355065, Foege Building, S220B, 3720 15th Ave NE, Seattle, WA 98195-5065, william-noble@uw.edu

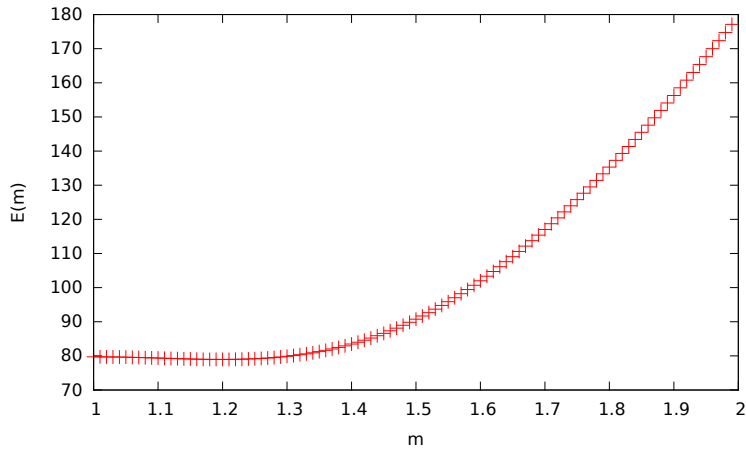

Figure 1: **Using decoys to set the  $m$  parameter.** The figure plots the error  $E(m)$  (Equation 12) as a function of the parameter  $m$ . To generate this plot, the *Plasmodium* data set was analyzed using both XCorr p-value and res-ev p-value. All decoy p-values for each spectrum were retained, yielding a set of 197,029 pairs of p-values. Values of  $E(m)$  were computed for  $m = 1.00, 1.01, \dots, 1.99$ . The minimum error value occurs around  $m = 1.20$ .
